# Supplementary material for: Targeted Development of Registries of Biological Parts
Source: PLoS One. 2008 Jul 16;3(7):e2671. doi: 10.1371/journal.pone.0002671 (PMC2441434; doi:10.1371/journal.pone.0002671)
Supplement: Table S1 — Blast analysis of the clones assembled sequences against the published sequence. (0.14 MB XLS) [file pone.0002671.s002.xls]

## Sheet: VBIonBBa_tophits.txt
query	q_len	Published sequence	Pub_seq_len	Min Match length %	% identity	Match length	mismatch	gap	VBI start	VBI end	bba start	bba end	e-value	score	pub_len-q_len	hit_len/min(q_len, pub_len)
3A2H2	1350	BBa_J61026	448	94.8661	96	425	13	0	919	1343	448	24	0	755	-902	0.948661
3A1A12	931	BBa_J23106	35	82.8571	93	29	2	0	13	41	7	35	5e-09	42.1	-896	0.828571
3A1H12	927	BBa_J23113	35	100	100	35	0	0	1	35	1	35	2e-17	69.9	-892	1
3A1C12	917	BBa_J23108	35	82.8571	96	29	1	0	15	43	7	35	2e-11	50.1	-882	0.828571
3A1F12	909	BBa_J23111	35	100	100	35	0	0	12	46	1	35	2e-17	69.9	-874	1
3A1E12	907	BBa_J23110	35	100	100	35	0	0	5	39	1	35	2e-17	69.9	-872	1
3A1E11	905	BBa_J23102	35	97.1429	100	34	0	0	6	39	2	35	9e-17	67.9	-870	0.971429
3A1H11	904	BBa_J23105	35	97.1429	100	34	0	0	6	39	2	35	9e-17	67.9	-869	0.971429
3A2B1	904	BBa_J23115	35	97.1429	94	34	2	0	6	39	2	35	5e-12	52	-869	0.971429
3A2C1	904	BBa_J23116	35	100	100	35	0	0	5	39	1	35	2e-17	69.9	-869	1
3A1D12	903	BBa_J23109	35	100	100	35	0	0	4	38	1	35	2e-17	69.9	-868	1
3A2D1	902	BBa_J23117	35	97.1429	100	34	0	0	6	39	2	35	9e-17	67.9	-867	0.971429
3A1G11	902	BBa_J23104	35	100	100	35	0	0	4	38	1	35	2e-17	69.9	-867	1
3A2E1	896	BBa_J23118	35	100	100	35	0	0	5	39	1	35	2e-17	69.9	-861	1
3A1B8	866	BBa_J23033	40	27.5	100	11	0	0	843	853	40	30	0.005	22.3	-826	0.275
3B2F5	1009	BBa_J22090	388	23.7113	93	92	6	0	877	968	252	343	7e-36	135	-621	0.237113
3B1A2	1764	BBa_J45170	1295	8.95753	99	116	1	0	10	125	1271	1156	2e-61	222	-469	0.0895753
2B2D1	717	BBa_J01003	371	100	100	371	0	0	180	550	1	371	0	735	-346	1
3A1E8	282	BBa_J23036	40	100	100	40	0	0	222	261	1	40	9e-21	79.8	-242	1
3A1H7	284	BBa_J23031	42	100	100	42	0	0	222	263	1	42	6e-22	83.8	-242	1
3A1D7	335	BBa_J23008	94	100	100	94	0	0	223	316	1	94	2e-52	186	-241	1
3A1C7	266	BBa_J23007	27	100	100	27	0	0	221	247	1	27	3e-13	54	-239	1
3A1C9	964	BBa_J23072	732	100	99	732	7	0	199	930	1	732	0	1409	-232	1
3A1G8	386	BBa_J23044	199	36.6834	98	73	1	0	1	73	164	92	3e-37	137	-187	0.366834
3B2F6	1015	BBa_J22136	898	96.7706	98	869	9	0	147	1015	898	30	0	1665	-117	0.967706
2B2G2	1488	BBa_J07005	1416	0.776836	100	11	0	0	1164	1174	300	290	0.4	22.3	-72	0.00776836
2A1H10	322	BBa_I11021	255	100	100	255	0	0	20	274	1	255	1e-148	505	-67	1
2A1C5	420	BBa_E0033	353	100	98	353	7	0	21	373	1	353	0	658	-67	1
2A1D11	454	BBa_I11031	387	100	100	387	0	0	20	406	1	387	0	767	-67	1
2A1B5	366	BBa_C2001	300	100	100	300	0	0	20	319	1	300	1e-175	595	-66	1
2A1H3	353	BBa_C0073	288	100	97	288	7	0	20	307	1	288	1e-155	529	-65	1
2A1A4	488	BBa_C0074	423	97.6359	100	413	0	0	31	443	11	423	0	819	-65	0.976359
2A1G3	352	BBa_C0072	288	100	97	288	7	0	20	307	1	288	1e-155	529	-64	1
3A2H1	859	BBa_J61017	935	100	95	859	42	1	1	859	47	904	0	1376	76	1
2B1G8	313	BBa_I13535	268	93.6567	100	251	0	0	26	276	1	251	1e-146	498	-45	0.936567
1B2F4	888	BBa_I13405	2982	99.0991	96	880	28	1	6	885	1	879	0	1515	2094	0.990991
1B1E12	372	BBa_I13025	331	100	97	331	7	0	22	352	1	331	0	615	-41	1
3A2H4	570	BBa_J63006	549	100	97	549	11	0	10	558	1	549	0	1015	-21	1
3A1D4	725	BBa_S03515	710	100	97	710	17	1	10	718	1	710	0	1279	-15	1
2A1D7	1306	BBa_Q04121	1370	99.8469	97	1304	28	0	1	1304	1335	32	0	2363	64	0.998469
3B2C9	1033	BBa_J3901	1349	100	97	1033	22	0	1	1033	299	1331	0	1887	316	1
1A2F7	577	BBa_E0433	533	100	98	533	7	0	23	555	1	533	0	1015	-44	1
1B1F10	439	BBa_S03140	396	100	98	396	7	0	22	417	1	396	0	743	-43	1
1B1G12	507	BBa_I13027	466	100	98	466	7	0	22	487	1	466	0	882	-41	1
2B2G1	197	BBa_J01141	157	100	98	157	3	0	22	178	1	157	6e-83	287	-40	1
1A2A12	700	BBa_C0261	661	100	98	661	10	0	21	681	1	661	0	1245	-39	1
1A1H9	753	BBa_S0117	732	100	98	732	8	0	15	746	1	732	0	1402	-21	1
3A2C11	962	BBa_J33206	956	99.7908	98	954	18	2	1	954	4	955	0	1762	-6	0.997908
2A2E5	897	BBa_I5030	895	99.5531	98	891	9	1	7	897	1	890	0	1701	-2	0.995531
3A2A8	944	BBa_S03519	958	99.8941	98	943	10	2	3	944	1	942	0	1788	14	0.998941
2B2C3	803	BBa_J07012	762	46.3255	99	353	1	0	414	766	410	762	0	692	-41	0.463255
3A1E2	171	BBa_I13453	130	88.4615	100	115	0	0	23	137	1	115	3e-65	228	-41	0.884615
2B1F11	1608	BBa_J04086	1632	100	98	1608	23	3	1	1607	1612	21	0	3009	24	1
3A2A10	1365	BBa_S03541	1405	100.073	98	1366	24	1	1	1365	1385	20	0	2510	40	1.00073
2B1B7	170	BBa_I13453	130	88.4615	100	115	0	0	22	136	1	115	3e-65	228	-40	0.884615
3B1E5	977	BBa_S03597	1019	100	98	977	11	0	1	977	998	22	0	1850	42	1
2A1B12	955	BBa_I13018	998	99.1623	98	947	14	1	9	955	975	30	0	1758	43	0.991623
2B2A3	801	BBa_J07013	762	46.3255	99	353	1	0	416	768	410	762	0	692	-39	0.463255
1B1B1	1641	BBa_S01009	1691	100	98	1641	21	0	1	1641	1666	26	0	3100	50	1
1A1D3	789	BBa_C0051	750	88.9333	100	667	0	0	92	758	84	750	0	1322	-39	0.889333
3B1F1	1223	BBa_J45100	1294	100.082	98	1224	14	2	1	1223	1268	48	0	2317	71	1.00082
2A1E6	1276	BBa_Q01121	1372	99.4514	98	1269	15	0	1	1269	1321	53	0	2397	96	0.994514
4A1C3	1038	BBa_I51001	2438	100.096	98	1039	19	2	1	1038	2411	1374	0	1921	1400	1.00096
2A1G10	271	BBa_I11023	232	100	99	232	1	1	22	252	1	232	1e-130	444	-39	1
1B1G10	195	BBa_R0079	157	100	99	157	1	1	22	177	1	157	2e-85	295	-38	1
2A1G11	782	BBa_E2050	744	100	99	744	7	0	8	751	1	744	0	1433	-38	1
3A1A1	931	BBa_J61000	894	1.34228	100	12	0	0	567	578	458	447	0.04	24.3	-37	0.0134228
2B2C1	415	BBa_J01001	378	98.9418	100	374	0	0	22	395	1	374	0	741	-37	0.989418
3B1G9	607	BBa_J36844	571	99.8249	99	570	4	4	22	587	1	570	0	1067	-36	0.998249
4A1F2	979	BBa_J45997	943	100	99	943	1	0	3	945	1	943	0	1861	-36	1
1A1D11	900	BBa_P0353	866	100	99	866	7	0	7	872	1	866	0	1675	-34	1
1A2E8	805	BBa_S01638	780	100	99	780	2	0	7	786	1	780	0	1530	-25	1
1A1E4	786	BBa_E0032	762	100	99	762	2	0	9	770	1	762	0	1495	-24	1
1A2H8	839	BBa_P0456	815	100.123	99	816	4	1	11	826	1	815	0	1578	-24	1.00123
1A1D4	746	BBa_E0030	723	100	99	723	1	0	20	742	1	723	0	1425	-23	1
1B2F9	656	BBa_C0056	636	100	99	636	1	0	10	645	1	636	0	1253	-20	1
1B2B6	894	BBa_I13504	875	100	99	875	1	0	5	879	1	875	0	1727	-19	1
1B1H1	626	BBa_C0170	609	100	99	609	1	0	9	617	1	609	0	1199	-17	1
1B1C8	968	BBa_I13601	940	80.4255	100	756	0	0	35	790	42	797	0	1499	-28	0.804255
3A1C3	687	BBa_J31005	660	97.8788	100	646	0	0	24	669	14	659	0	1281	-27	0.978788
3B2A9	1707	BBa_J28031	1681	7.01963	94	118	7	1	1589	1705	143	26	2e-46	172	-26	0.0701963
1A2D12	700	BBa_I9026	685	100	99	685	1	0	10	694	1	685	0	1350	-15	1
1A1B4	738	BBa_E0020	723	100	99	723	2	0	12	734	1	723	0	1417	-15	1
1A1D8	745	BBa_S0105	730	100	99	730	7	0	11	740	1	730	0	1405	-15	1
3B2E8	831	BBa_J31002	816	100	99	816	1	0	9	824	816	1	0	1610	-15	1
1A1C8	725	BBa_S0104	712	100	99	712	1	0	7	718	1	712	0	1404	-13	1
1A1C4	775	BBa_E0022	762	100	99	762	2	0	9	770	1	762	0	1495	-13	1
1A1B8	814	BBa_S0103	793	87.2636	99	692	1	0	107	798	102	793	0	1364	-21	0.872636
3A2G3	781	BBa_P1004	769	99.6099	99	766	7	0	7	772	1	766	0	1477	-12	0.996099
1B1B3	774	BBa_E0036	762	100	99	762	2	0	9	770	1	762	0	1495	-12	1
1B2F10	952	BBa_I13600	940	100	99	940	1	0	4	943	1	940	0	1855	-12	1
1B2C8	753	BBa_I15017	742	100	99	742	1	0	5	746	1	742	0	1463	-11	1
2A2B4	874	BBa_S03182	855	80.117	100	685	0	0	190	874	164	848	0	1358	-19	0.80117
2A1G4	924	BBa_C0080	915	99.3443	99	909	7	0	1	909	7	915	0	1760	-9	0.993443
2B2D2	917	BBa_J07044	899	39.2659	99	353	1	0	425	777	410	762	0	692	-18	0.392659
1B1A2	738	BBa_C0171	729	100	99	729	1	0	4	732	1	729	0	1437	-9	1
1A1F9	812	BBa_S0115	795	87.044	100	692	0	0	113	804	104	795	0	1372	-17	0.87044
1A2H12	753	BBa_I9030	745	100	99	745	2	0	2	746	1	745	0	1461	-8	1
1A1G8	794	BBa_S0108	786	100	99	786	1	0	5	790	1	786	0	1550	-8	1
1A1A8	794	BBa_S0102	787	100	99	787	1	0	7	793	1	787	0	1552	-7	1
2A1D6	935	BBa_Q03530	928	100	99	928	8	0	5	932	1	928	0	1790	-7	1
3A2F1	941	BBa_J61015	935	99.7861	99	933	9	0	1	933	3	935	0	1792	-6	0.997861
1B1D5	601	BBa_C0161	585	96.4103	99	564	2	1	30	592	22	585	0	1094	-16	0.964103
4A1F4	832	BBa_E7105	826	99.8789	99	825	1	0	8	832	1	825	0	1628	-6	0.998789
1A2E1	939	BBa_I6050	935	99.5722	99	931	1	0	1	931	5	935	0	1838	-4	0.995722
3A1F6	864	BBa_J23039	860	100	99	860	7	0	5	864	1	860	0	1663	-4	1
1B2G8	864	BBa_I13507	861	99.7677	99	859	8	0	6	864	1	859	0	1653	-3	0.997677
2A2D5	880	BBa_I5020	877	100	99	877	2	1	4	880	1	876	0	1715	-3	1
3B1C10	799	BBa_J36848	797	100	99	797	5	5	3	795	1	796	0	1501	-2	1
1A1H8	806	BBa_S0109	792	87.3737	100	692	0	0	107	798	101	792	0	1372	-14	0.873737
1A1B12	868	BBa_P0453	867	99.5386	99	863	7	0	6	868	1	863	0	1669	-1	0.995386
2A1H7	902	BBa_Q04520	903	99.8891	99	901	2	0	2	902	1	901	0	1770	1	0.998891
3A1A1	852	BBa_S03633	839	2.86055	100	24	0	0	9	32	839	816	2e-09	48.1	-13	0.0286055
3B1A10	848	BBa_J36846	850	100.118	99	849	4	4	4	848	1	849	0	1620	2	1.00118
3A1E3	813	BBa_J31003	816	99.754	99	811	1	0	3	813	1	811	0	1600	3	0.99754
2B1F10	935	BBa_I7109	938	99.7861	99	933	1	0	3	935	2	934	0	1842	3	0.997861
1A1C6	875	BBa_E0420	878	99.8857	99	874	1	0	2	875	1	874	0	1725	3	0.998857
1A1B6	913	BBa_E0432	917	99.6714	99	910	2	0	4	913	1	910	0	1788	4	0.996714
2A1D12	961	BBa_S01532	965	99.8959	99	960	2	1	3	961	1	960	0	1879	4	0.998959
1A1A6	873	BBa_E0430	878	99.4273	99	868	1	0	6	873	1	868	0	1713	5	0.994273
2A1A7	926	BBa_Q01530	931	99.784	99	924	7	0	3	926	1	924	0	1790	5	0.99784
1B2G6	929	BBa_I13519	936	99.8924	99	928	2	0	2	929	1	928	0	1824	7	0.998924
2B1E10	972	BBa_I13528	980	99.5885	99	968	9	0	5	972	1	968	0	1861	8	0.995885
1A1B11	938	BBa_P0351	929	88.8052	100	825	0	0	87	911	101	925	0	1635	-9	0.888052
2B2A5	904	BBa_J13040	914	99.2257	99	897	7	0	5	901	1	897	0	1737	10	0.992257
3A2B12	911	BBa_J09250	921	100	99	911	2	0	1	911	8	918	0	1790	10	1
1A2F10	968	BBa_I13603	979	99.8967	99	967	3	1	2	968	4	969	0	1885	11	0.998967
1A1H12	921	BBa_I6036	935	100	99	921	1	0	1	921	7	927	0	1818	14	1
1B2C4	842	BBa_I13401	857	99.1686	99	835	1	0	8	842	6	840	0	1647	15	0.991686
2B1H8	945	BBa_I13523	961	99.8942	99	944	1	0	2	945	9	952	0	1863	16	0.998942
3B1B5	852	BBa_S03575	869	100	99	852	1	1	1	852	2	852	0	1673	17	1
2A2B5	933	BBa_I5000	952	99.3569	99	927	1	1	7	933	4	929	0	1822	19	0.993569
3B2E9	912	BBa_J54103	931	99.5614	99	908	8	2	1	903	1	907	0	1729	19	0.995614
2A1A5	1498	BBa_C0083	1518	99.2657	99	1487	5	0	7	1493	1518	32	0	2908	20	0.992657
1A2B4	919	BBa_I6101	939	99.6736	99	916	4	0	4	919	1	916	0	1784	20	0.996736
3B1E4	980	BBa_J32008	1000	100	99	980	4	0	1	980	3	982	0	1911	20	1
1A2B2	956	BBa_I6061	979	99.6862	99	953	3	1	4	956	4	955	0	1857	23	0.996862
2A1E12	984	BBa_S01650	1007	100.102	99	985	1	1	1	984	3	987	0	1937	23	1.00102
2A1C11	1176	BBa_I11030	1200	99.4898	99	1170	3	0	7	1176	1200	31	0	2296	24	0.994898
2A2C5	962	BBa_I5010	958	80.6889	100	773	0	0	190	962	164	936	0	1532	-4	0.806889
1A1G11	899	BBa_P0450	924	99.4438	99	894	1	1	7	899	7	900	0	1756	25	0.994438
1B1C3	913	BBa_I7101	938	99.8905	99	912	1	0	2	913	1	912	0	1800	25	0.998905
2B1D9	922	BBa_I13524	947	99.8915	99	921	7	0	2	922	1	921	0	1784	25	0.998915
1B2D3	952	BBa_I13602	979	99.0546	99	943	2	1	11	952	956	14	0	1846	27	0.990546
2A1A12	937	BBa_S01001	964	100	99	937	9	0	1	937	8	944	0	1786	27	1
3B2B5	1553	BBa_J22061	1583	100	99	1553	15	1	2	1553	14	1566	0	2966	30	1
1B2H2	969	BBa_A340620	999	100	99	969	1	0	1	969	7	975	0	1913	30	1
1A2E2	943	BBa_I6066	974	100	99	943	1	0	1	943	6	948	0	1861	31	1
1A2D2	949	BBa_I6064	980	100.105	99	950	2	1	1	949	5	954	0	1859	31	1.00105
1A2B6	970	BBa_I6203	1002	99.2784	99	963	2	0	8	970	978	16	0	1893	32	0.992784
4A1D7	925	BBa_S03653	925	98.5946	99	912	2	0	14	925	11	922	0	1792	0	0.985946
2B1H9	963	BBa_I13527	995	99.3769	99	957	2	1	8	963	13	969	0	1873	32	0.993769
1A2D3	940	BBa_I6080	974	100	99	940	2	0	1	940	9	948	0	1848	34	1
2B1G10	942	BBa_M30011	977	100	99	942	9	1	1	942	27	967	0	1802	35	1
1B1D4	1597	BBa_I0407	1633	99.3112	99	1586	14	1	12	1596	1610	25	0	3025	36	0.993112
3A2H5	1118	BBa_J52026	1155	99.5528	99	1113	6	1	1	1113	1134	23	0	2151	37	0.995528
1A2G2	942	BBa_I6070	979	100	99	942	2	0	1	942	963	22	0	1852	37	1
1A2C5	927	BBa_I6111	964	100	99	927	1	0	1	927	13	939	0	1830	37	1
2B1E1	1087	BBa_J04421	1125	99.816	99	1085	4	1	1	1084	1105	21	0	2111	38	0.99816
4A1C7	927	BBa_S03652	931	97.8425	100	907	0	0	14	920	1	907	0	1798	4	0.978425
1A2H6	993	BBa_I6210	1033	99.0937	99	984	4	1	11	993	1010	27	0	1911	40	0.990937
1B2G2	1118	BBa_F2621	1158	100.089	99	1119	3	2	1	1118	1137	20	0	2179	40	1.00089
1A1D12	1045	BBa_I6030	1086	100	99	1045	2	0	1	1045	1061	17	0	2056	41	1
1B1E10	993	BBa_S03119	998	98.288	99	976	1	1	19	993	3	978	0	1919	5	0.98288
1B1E6	1164	BBa_S03185	1206	100	99	1164	10	1	1	1164	1179	17	0	2220	42	1
1A2C1	993	BBa_I6044	1037	100	99	993	1	0	1	993	1011	19	0	1961	44	1
2A1B7	1324	BBa_Q03121	1369	99.6224	99	1319	7	0	1	1319	1349	31	0	2559	45	0.996224
2B2F5	986	BBa_I7121	1031	99.8986	99	985	2	1	1	985	1008	25	0	1929	45	0.998986
1B1A1	1673	BBa_S01007	1718	100	99	1673	7	0	1	1673	1692	20	0	3261	45	1
3A2C10	950	BBa_S03550	958	98.5263	99	936	7	0	15	950	1	936	0	1814	8	0.985263
1B1G1	1586	BBa_S01010	1631	100	99	1586	4	0	1	1586	1605	20	0	3112	45	1
3B1A6	1358	BBa_S03605	1403	100	99	1358	13	1	2	1358	1378	21	0	2581	45	1
3B2B6	1242	BBa_J22101	1288	99.839	99	1240	12	1	3	1242	27	1265	0	2355	46	0.99839
1A2D4	953	BBa_I6103	963	98.426	99	938	3	0	16	953	1	938	0	1836	10	0.98426
1B1E1	1524	BBa_S01012	1571	99.6719	99	1519	1	1	1	1519	1545	28	0	2995	47	0.996719
1A2A7	956	BBa_I6211	1003	99.8954	99	955	3	0	1	955	977	23	0	1869	47	0.998954
3B1G1	1183	BBa_J45119	1230	99.9155	99	1182	6	1	1	1182	1212	34	0	2292	47	0.999155
1A2E6	1035	BBa_I6207	1082	100.097	99	1036	3	1	1	1035	1059	24	0	2022	47	1.00097
1B1H7	1756	BBa_S03181	1804	99.1458	99	1741	7	1	1	1741	1779	40	0	3388	48	0.991458
1A2B8	869	BBa_E0438	883	98.504	99	856	3	0	14	869	875	20	0	1673	14	0.98504
3A2H9	1122	BBa_J24679	1170	99.6435	99	1118	9	0	1	1118	1153	36	0	2145	48	0.996435
2B1A12	1115	BBa_J04871	1163	100	99	1115	5	1	1	1115	1137	24	0	2163	48	1
3B1A5	1582	BBa_S03573	1630	100.063	99	1583	13	1	1	1582	1603	21	0	3027	48	1.00063
2B2B2	939	BBa_J07021	954	98.722	99	927	2	1	14	939	13	939	0	1814	15	0.98722
3B1D1	1162	BBa_J45098	1211	100	99	1162	7	2	1	1162	1188	31	0	2236	49	1
1B1B7	961	BBa_S01983	977	94.693	100	910	0	0	44	953	40	949	0	1804	16	0.94693
1A2B3	973	BBa_I6076	1022	100	99	973	1	0	1	973	996	24	0	1921	49	1
1B2D2	1897	BBa_I13273	1947	100	99	1897	16	1	1	1896	1921	25	0	3626	50	1
2A1H8	1036	BBa_C0024	1053	98.8417	99	1024	5	0	8	1031	1048	25	0	1990	17	0.988417
1A1G7	1121	BBa_S0100	1171	100	99	1121	1	0	1	1121	1153	33	0	2214	50	1
1A1E11	1257	BBa_P0412	1308	100	99	1257	2	0	1	1257	1282	26	0	2476	51	1
1A1H11	911	BBa_P0451	930	12.843	100	117	0	0	795	911	794	910	9e-65	232	19	0.12843
2B1H11	1112	BBa_J04771	1163	100	99	1112	3	0	1	1112	1137	26	0	2181	51	1
2B2E5	982	BBa_I7120	1033	100	99	982	3	0	1	982	1007	26	0	1923	51	1
2B2A6	1320	BBa_J06801	1371	100.076	99	1321	11	1	1	1320	1352	32	0	2524	51	1.00076
2B1B12	1111	BBa_J04971	1163	100.09	99	1112	3	1	1	1111	1137	26	0	2173	52	1.0009
4A1E2	1031	BBa_J45995	1085	99.709	99	1028	4	1	1	1028	1058	34	0	2002	54	0.99709
3A2B8	1117	BBa_S03520	1171	99.9105	99	1116	1	0	1	1116	1147	32	0	2204	54	0.999105
1A2G1	921	BBa_I6056	942	14.658	100	135	0	0	787	921	806	940	2e-75	268	21	0.14658
1B1D1	1631	BBa_S01013	1685	100	99	1631	8	0	1	1631	1659	29	0	3170	54	1
4A1F5	1552	BBa_Q200714	1606	100	99	1552	7	2	1	1552	1576	27	0	3005	54	1
1B1C1	1517	BBa_S01008	1571	100	99	1517	3	0	1	1517	1545	29	0	2983	54	1
4A1E5	1523	BBa_Q20070	1579	99.5404	99	1516	9	1	8	1523	1541	27	0	2926	56	0.995404
1A2A3	1019	BBa_I6074	1076	99.7056	99	1016	7	0	1	1016	1046	31	0	1959	57	0.997056
3B1E1	1207	BBa_J45099	1232	98.7572	98	1192	14	1	5	1196	1209	21	0	2248	25	0.987572
4A1A6	1468	BBa_P2007	1526	100	99	1468	8	0	1	1468	1497	30	0	2847	58	1
1B1C11	1113	BBa_S03184	1172	99.8203	99	1111	1	0	1	1111	1144	34	0	2194	59	0.998203
1A2F6	1015	BBa_I6208	1074	100	99	1015	1	0	1	1015	1048	34	0	2004	59	1
2A1G6	963	BBa_Q01510	989	89.4081	99	861	1	0	97	957	104	964	0	1699	26	0.894081
3A2G4	1418	BBa_J63005	1445	72.6375	98	1030	11	1	379	1408	1055	27	0	1961	27	0.726375
1A1E8	1110	BBa_S0106	1170	100	99	1110	1	0	1	1110	1146	37	0	2192	60	1
1A2D1	921	BBa_I6046	983	99.7828	99	919	4	0	1	919	954	36	0	1790	62	0.997828
1A2B7	1005	BBa_I6212	1033	96.6169	99	971	1	0	12	982	1010	40	0	1917	28	0.966169
3B1C7	1040	BBa_S03630	1069	98.75	99	1027	4	1	8	1034	1040	15	0	1996	29	0.9875
3B2B1	1281	BBa_S03595	1349	99.7658	99	1278	3	0	4	1281	34	1311	0	2510	68	0.997658
3A1C1	927	BBa_J61002	3002	99.6764	99	924	9	0	1	924	18	941	0	1774	2075	0.996764
3A2D5	691	BBa_J52017	4101	99.1317	99	685	1	0	1	685	3417	4101	0	1350	3410	0.991317
1A1C7	914	BBa_I4200	7273	99.3435	99	908	1	1	5	911	1	908	0	1784	6359	0.993435
1A1E7	916	BBa_I4202	7315	100	99	916	5	1	1	916	937	23	0	1768	6399	1
1B1H12	669	BBa_I13028	622	100	100	622	0	0	23	644	1	622	0	1233	-47	1
1A1F4	244	BBa_R0010	200	100	100	200	0	0	23	222	1	200	1e-115	396	-44	1
3A1D2	244	BBa_R0010	200	100	100	200	0	0	23	222	1	200	1e-115	396	-44	1
1B2A1	247	BBa_I13030	204	100	100	204	0	0	23	226	1	204	1e-118	404	-43	1
3A2B10	383	BBa_S03549	340	100	100	340	0	0	23	362	1	340	0	674	-43	1
3A1H2	171	BBa_B0015	129	100	100	129	0	0	23	151	1	129	1e-73	256	-42	1
2B2H1	199	BBa_J01142	157	100	100	157	0	0	22	178	1	157	4e-90	311	-42	1
2A1C9	210	BBa_I14016	168	100	100	168	0	0	22	189	1	168	1e-96	333	-42	1
2B1G9	1081	BBa_I13542	1118	98.9824	98	1070	15	0	12	1081	1095	26	0	2030	37	0.989824
2A1B9	212	BBa_I14015	170	100	100	170	0	0	22	191	1	170	8e-98	337	-42	1
1B2B1	256	BBa_I13031	214	100	100	214	0	0	22	235	1	214	1e-124	424	-42	1
1B2H8	262	BBa_J04500	220	100	100	220	0	0	22	241	1	220	1e-127	436	-42	1
1B1G5	264	BBa_E5502	222	100	100	222	0	0	22	243	1	222	1e-128	440	-42	1
1A2D8	908	BBa_I5100	946	98.348	99	893	2	1	5	896	924	32	0	1746	38	0.98348
2B2B5	287	BBa_J13210	245	100	100	245	0	0	22	266	1	245	1e-142	486	-42	1
1A1B3	702	BBa_C0040	660	100	100	660	0	0	11	670	1	660	0	1308	-42	1
2A1D10	300	BBa_I11033	260	100	100	260	0	0	22	281	1	260	1e-151	515	-40	1
3B2C6	231	BBa_J22106	192	100	100	192	0	0	20	211	192	1	1e-111	381	-39	1
1A1E3	708	BBa_C0052	669	100	100	669	0	0	8	676	1	669	0	1326	-39	1
2A1E3	680	BBa_C0070	642	100	100	642	0	0	10	651	1	642	0	1273	-38	1
1A2C11	1000	BBa_I6204	1042	98.2	99	982	1	0	12	993	1018	37	0	1939	42	0.982
2A1E4	679	BBa_C0078	642	100	100	642	0	0	8	649	1	642	0	1273	-37	1
1A1C3	780	BBa_C0050	744	100	100	744	0	0	9	752	1	744	0	1475	-36	1
2A1H6	994	BBa_Q01511	1037	91.3481	100	908	0	0	3	910	1011	104	0	1800	43	0.913481
2A1B11	784	BBa_I15009	750	100	100	750	0	0	5	754	1	750	0	1487	-34	1
1B1E8	1418	BBa_S03145	1462	94.2877	99	1337	8	0	1	1337	1438	102	0	2601	44	0.942877
2A1E11	787	BBa_E2020	753	100	100	753	0	0	5	757	1	753	0	1493	-34	1
2A1C4	735	BBa_C0076	702	100	100	702	0	0	5	706	1	702	0	1392	-33	1
2A2A6	786	BBa_E3030	753	100	100	753	0	0	4	756	1	753	0	1493	-33	1
1A1A4	787	BBa_C0062	756	100	100	756	0	0	3	758	1	756	0	1499	-31	1
4A1G5	450	BBa_P2005	425	100	100	425	0	0	22	446	1	425	0	842	-25	1
1B1H5	825	BBa_E5503	803	99.5019	100	799	0	0	15	813	5	803	0	1584	-22	0.995019
3A2H7	723	BBa_S03518	703	100	100	703	0	0	12	714	1	703	0	1394	-20	1
1A1F8	720	BBa_S0107	702	100	100	702	0	0	10	711	1	702	0	1392	-18	1
1B1D2	626	BBa_C0178	609	100	100	609	0	0	11	619	1	609	0	1207	-17	1
1B1B6	758	BBa_S01022	741	100	100	741	0	0	12	752	1	741	0	1469	-17	1
1B1C5	773	BBa_C0160	756	100	100	756	0	0	9	764	1	756	0	1499	-17	1
1A2C12	822	BBa_S03158	805	100	100	805	0	0	11	815	1	805	0	1596	-17	1
3B1F5	876	BBa_S03600	861	100	100	861	0	0	7	867	1	861	0	1707	-15	1
3B1A1	1086	BBa_J45008	1134	98.9871	99	1075	2	0	8	1082	1103	29	0	2115	48	0.989871
1A1A9	725	BBa_S0110	711	100	100	711	0	0	11	721	1	711	0	1409	-14	1
1B1A6	815	BBa_E5504	801	100	100	801	0	0	7	807	1	801	0	1588	-14	1
1B1A8	754	BBa_S01014	741	100	100	741	0	0	10	750	1	741	0	1469	-13	1
2B1E9	951	BBa_I7107	939	99.2545	100	932	0	0	18	949	4	935	0	1848	-12	0.992545
3A1C6	1039	BBa_P1014	1088	53.9942	99	561	1	0	479	1039	581	21	0	1104	49	0.539942
1A2D5	945	BBa_I6112	994	97.7778	99	924	1	0	1	924	968	45	0	1824	49	0.977778
1A1D9	716	BBa_S0113	705	100	100	705	0	0	7	711	1	705	0	1398	-11	1
1A1E9	799	BBa_S0114	789	100	100	789	0	0	7	795	1	789	0	1564	-10	1
3A1E5	1336	BBa_S03533	1386	6.73653	90	90	9	1	1196	1284	164	75	1e-28	113	50	0.0673653
1B1A3	767	BBa_E0044	759	99.8682	100	758	0	0	5	762	1	758	0	1503	-8	0.998682
1A1C11	855	BBa_P0352	848	99.8821	100	847	0	0	9	855	1	847	0	1679	-7	0.998821
4A1G4	832	BBa_E7107	826	100	100	826	0	0	7	832	1	826	0	1637	-6	1
1B2C10	946	BBa_I13013	941	99.6812	100	938	0	0	1	938	4	941	0	1859	-5	0.996812
4A1D4	827	BBa_E71214	822	99.8783	100	821	0	0	7	827	1	821	0	1628	-5	0.998783
1A1H10	844	BBa_P0340	839	99.8808	100	838	0	0	3	840	1	838	0	1661	-5	0.998808
1A1E10	853	BBa_P0152	851	99.765	100	849	0	0	5	853	1	849	0	1683	-2	0.99765
2A2C2	997	BBa_S01416	1049	86.1585	100	859	0	0	1	859	1022	164	0	1703	52	0.861585
1A1F11	841	BBa_P0440	840	99.5238	100	836	0	0	6	841	1	836	0	1657	-1	0.995238
1B2G1	885	BBa_I1468	884	99.5475	100	880	0	0	6	885	1	880	0	1744	-1	0.995475
2A1C7	900	BBa_Q03400	901	99.8889	100	899	0	0	2	900	1	899	0	1782	1	0.998889
2A2F5	937	BBa_I7100	940	99.4664	100	932	0	0	6	937	1	932	0	1848	3	0.994664
1A2G10	921	BBa_S01000	924	100	100	921	0	0	1	921	2	922	0	1826	3	1
1A1D6	913	BBa_E0422	917	99.3428	100	907	0	0	7	913	7	913	0	1798	4	0.993428
1B2F1	879	BBa_I1466	884	100	100	879	0	0	1	879	2	880	0	1742	5	1
1A2E12	792	BBa_S03156	799	99.3687	100	787	0	0	6	792	1	787	0	1560	7	0.993687
1A2D11	934	BBa_I0466	942	100	100	934	0	0	1	934	1	934	0	1852	8	1
4A1H5	1527	BBa_P2006	1586	72.3641	99	1105	6	1	424	1527	1134	30	0	2135	59	0.723641
1A1F12	931	BBa_I6032	940	99.8926	100	930	0	0	2	931	1	930	0	1844	9	0.998926
1B2C11	867	BBa_I13004	877	99.7693	100	865	0	0	3	867	1	865	0	1715	10	0.997693
1B2B9	931	BBa_I6048	942	100	100	931	0	0	1	931	4	934	0	1846	11	1
3A2E3	929	BBa_P1002	943	99.5694	100	925	0	0	5	929	1	925	0	1834	14	0.995694
1B2F6	919	BBa_I13518	935	99.8912	100	918	0	0	2	919	1	918	0	1820	16	0.998912
3A2F11	1389	BBa_J44011	1454	11.951	94	166	9	1	1211	1375	198	33	6e-74	264	65	0.11951
1A2D7	960	BBa_I6214	977	99.2708	100	953	0	0	1	953	2	954	0	1889	17	0.992708
3A2A12	1349	BBa_S03624	1420	10.6746	93	144	10	2	1207	1349	164	22	5e-56	204	71	0.106746
1A1A11	903	BBa_P0350	923	100	100	903	0	0	1	903	1	903	0	1790	20	1
1A2F3	956	BBa_I6084	980	100	100	956	0	0	1	956	13	968	0	1895	24	1
1B2C1	171	BBa_I13032	254	78.9474	100	135	0	0	22	156	1	135	8e-77	268	83	0.789474
3A2A11	929	BBa_J33204	958	100	100	929	0	0	1	929	951	23	0	1842	29	1
2B1F1	963	BBa_J04430	1083	13.3956	100	129	0	0	835	963	947	1075	8e-72	256	120	0.133956
3A2C12	897	BBa_J09271	927	99.777	100	895	0	0	1	895	2	896	0	1774	30	0.99777
1B2D7	759	BBa_I13973	974	95.2569	100	723	0	0	24	746	70	792	0	1433	215	0.952569
3A1A3	898	BBa_J31007	1191	98.5523	99	885	4	1	8	892	1169	286	0	1715	293	0.985523
3B2A1	941	BBa_S03591	1251	11.6897	100	110	0	0	832	941	1115	1224	2e-60	218	310	0.116897
1A1E6	937	BBa_I0460	969	100	100	937	0	0	1	937	943	7	0	1857	32	1
3A2A6	895	BBa_J52028	1221	1.22905	100	11	0	0	43	53	782	772	0.21	22.3	326	0.0122905
2B1B4	314	BBa_I5121	898	18.4713	100	58	0	0	106	163	796	853	5e-30	115	584	0.184713
3A2A3	800	BBa_J61027	1392	52.375	95	419	18	0	382	800	35	453	0	704	592	0.52375
3A1G4	853	BBa_S03524	1447	88.8628	95	758	35	1	96	853	179	935	0	1217	594	0.888628
2B1D4	308	BBa_I5131	906	18.8312	100	58	0	0	102	159	804	861	5e-30	115	598	0.188312
2B1F12	313	BBa_S03422	992	45.6869	100	143	0	0	20	162	796	938	1e-80	283	679	0.456869
2B2C2	171	BBa_J07043	899	78.9474	100	135	0	0	16	150	765	899	3e-76	268	728	0.789474
2B2E2	170	BBa_J07045	899	79.4118	100	135	0	0	16	150	765	899	3e-76	268	729	0.794118
4A1E7	1063	BBa_I20100	1798	84.1016	99	894	1	0	1	894	1769	876	0	1764	735	0.841016
1B2G3	1148	BBa_I13604	1888	80.5749	98	925	12	0	91	1015	950	26	0	1739	740	0.805749
1B1A10	805	BBa_S03143	1599	86.7081	99	698	1	0	108	805	102	799	0	1376	794	0.867081
1B2G10	1460	BBa_I13637	2419	41.6438	92	608	44	2	853	1460	215	820	0	841	959	0.416438
1A2E11	931	BBa_S01004	1905	96.348	99	897	8	1	36	931	1	897	0	1707	974	0.96348
2B2E4	993	BBa_I11061	2063	10.6747	96	106	4	0	7	112	1585	1480	3e-48	178	1070	0.106747
1B1F1	439	BBa_S01011	1691	8.42825	100	37	0	0	387	423	775	811	4e-17	73.8	1252	0.0842825
3B2F8	1141	pSB1A7	2431	0.964067	100	11	0	0	266	276	412	402	0.53	22.3	1290	0.00964067
2A2G4	958	BBa_I13624	2284	96.5553	99	925	4	0	30	954	1360	2284	0	1802	1326	0.965553
1A2C4	920	BBa_I6102	953	100	100	920	0	0	1	920	8	927	0	1824	33	1
2B2G4	993	BBa_I15022	2858	12.3867	100	123	0	0	1	123	1838	1716	8e-68	244	1865	0.123867
3A1F9	925	BBa_J23018	2977	97.0811	99	898	7	0	1	898	23	920	0	1739	2052	0.970811
1A2C7	933	BBa_I6213	970	99.3569	100	927	0	0	7	933	947	21	0	1838	37	0.993569
3A2D12	1005	BBa_J09855	1044	100	100	1005	0	0	1	1005	1020	16	0	1992	39	1
3A1D1	903	BBa_J61003	3016	14.6179	99	132	1	0	772	903	16	147	8e-71	254	2113	0.146179
1A1A7	942	BBa_I5600	3821	67.8344	90	639	59	2	1	639	3804	3168	0	783	2879	0.678344
1A1H6	933	BBa_I4204	3927	79.9571	100	746	0	0	53	798	3000	3745	0	1479	2994	0.799571
1A2B5	950	BBa_I6110	994	99.8947	100	949	0	0	1	949	971	23	0	1881	44	0.998947
1B2C9	956	BBa_I6104	1003	99.0586	100	947	0	0	1	947	977	31	0	1877	47	0.990586
1B2C7	811	BBa_I13908	4329	98.397	97	798	22	3	5	801	4307	3512	0	1398	3518	0.98397
1A1C10	800	BBa_P0150	926	99.125	100	793	0	0	8	800	1	793	0	1572	126	0.99125
1A1B7	953	BBa_I5610	4262	100	100	953	0	0	1	953	3291	4243	0	1889	3309	1
